# Supplementary material for: Glyceraldehyde-3-phosphate dehydrogenase Gh_GAPDH9 is associated with drought resistance in Gossypium hirsutum
Source: PeerJ. 2023 Nov 23;11:e16445. doi: 10.7717/peerj.16445 (PMC10676720; doi:10.7717/peerj.16445)
Supplement: Supplemental Information 1 [file peerj-11-16445-s001.xlsx]

## Sheet: Table S1
Table S1: Primer sequence of GhGAPDH
Primer name	Gene name	Sequence(5'-3')
GhUBQ7-qPCR-F	UBQ7	GAAGGCATTCCACCTGACCAAC
GhUBQ7-qPCR-R	UBQ7	CTTGACCTTCTTCTTCTTGTGCTTG
Ghir_A07G025060-qPCR-F	GhGAPDH9/GhGAPA2	CCCGACCTATGTTGTCGGAG
Ghir_A07G025060-qPCR-R	GhGAPDH9/GhGAPA2	TTGACAAAGGGAGCAAGGCA
Ghir_A07G025060-Clone-F	GhGAPDH9/GhGAPA2	ATGGTGTCGGTTACTGTTTCTG
Ghir_A07G025060-Clone-R	GhGAPDH9/GhGAPA2	TCACTTCCAGTTGTTGGCA
Ghir_A07G025060-OE-F	pCAMBIA3301-GhGAPDH9/GhGAPA2	GGAATTCATGGTGTCGGTTACTGTTTCTG
Ghir_A07G025060-OE-R	pCAMBIA3301-GhGAPDH9/GhGAPA2	CCCAAGCTTTCACTTCCAGTTGTTGGCA
Ghir_A07G025060-VIGS-F	pTRV2-GhGAPDH9/GhGAPA2	GAGTGGGCCTAAGTGTCCTG
Ghir_A07G025060-VIGS-R	pTRV2-GhGAPDH9/GhGAPA2	ACCATAGGCACGATTCACCG
